# Supplementary material for: Dendritic osmosensors modulate activity-induced calcium influx in oxytocinergic magnocellular neurons of the mouse PVN
Source: eLife journal article supplement (doi:10.7554/elife.63486), 2021-07-12
Supplement: supp [file elife-63486-supp-v1.zip]

Archive with 21 entries (21 files):
- elife_poa_e63486_Figure_1_source_data_1.xlsx
- elife_poa_e63486_Figure_1_figure_supplement_1_source_data_1.xlsx
- elife_poa_e63486_Figure_2_source_data_1.xlsx
- elife_poa_e63486_Figure_3_source_data_1.xlsx
- elife_poa_e63486_Figure_3_figure_supplement_1_source_data_1.xlsx
- elife_poa_e63486_Figure_4_source_data_1.xlsx
- elife_poa_e63486_Figure_4_figure_supplement_1_source_data_1.xlsx
- elife_poa_e63486_Figure_4_figure_supplement_2_source_data_1.xlsx
- elife_poa_e63486_Figure_4_figure_supplement_3_source_data_1.xlsx
- elife_poa_e63486_Figure_5_source_data_1.xlsx
- elife_poa_e63486_Figure_6_source_data_1.xlsx
- elife_poa_e63486_Figure_7_source_data_1.xlsx
- elife_poa_e63486_Figure_8_source_data_1.xlsx
- elife_poa_e63486_Figure_8_figure_supplement_1_source_data_1.xlsx
- elife_poa_e63486_Figure_8_figure_supplement_2_source_data_1.xlsx
- elife_poa_e63486_Figure_9_source_data_1.xlsx
- elife_poa_e63486_Transparent_Reporting_File.pdf
- elife_poa_e63486_Figure_1_figure_supplement_1.pdf
- elife_poa_e63486_Figure_4_figure_supplement_1.pdf
- elife_poa_e63486_Figure_4_figure_supplement_2.pdf
- elife_poa_e63486_Figure_4_figure_supplement_3.pdf
