# Supplementary material for: Dendritic osmosensors modulate activity-induced calcium influx in oxytocinergic magnocellular neurons of the mouse PVN
Source: eLife journal article supplement (doi:10.7554/elife.63486), 2021-07-12
Supplement: supp [file elife-63486-supp-v1.zip › elife_poa_e63486_Figure_1_figure_supplement_1_source_data_1.xlsx]

## Sheet: Fig. 1-1
Panel A	Membrane Resistance (MΩ)					Panel B	Transient Current (pA)					Panel C	Delay to First Spike (msec)					Panel D	Whole-cell Capacitance (pF)
n cells	38	24	15	7		n cells	30	15	15	7		n cells	24	12	13	6		n cells	38	24	15	7
n animals	15	12	3	6		n animals	11	7	3	6		n animals	9	6	3	5		n animals	15	12	3	6
	OT-MCN (male)	OT-MCN (female)	OT-PCN (male)	OT-PCN (female)			OT-MCN (male)	OT-MCN (female)	OT-PCN (male)	OT-PCN (female)			OT-MCN (male)	OT-MCN (female)	OT-PCN (male)	OT-PCN (female)			OT-MCN (male)	OT-MCN (female)	OT-PCN (male)	OT-PCN (female)
	1020.86	2501.43	1343.61	551.265			7.812	10.9399	-12.7507	-1.20849			267.7	285.7	43.2	63.25			26.5071	35.1647	41.965	24.2776
	1712.96	1977.82	664.681	619.442			10.4668	4.70044	-10.5805	-29.475			207.7	175.9	44.45	58.1			25.0376	28.1865	29.1516	21.5325
	703.274	1873.61	329.077	1299.5			14.9868	10.6336	-13.4268	-30.2185			392.25	174.8	58.75	53.85			33.7915	27.2399	25.3239	50.9402
	1067.89	1351.11	517.649	1099.15			8.22914	9.3485	-13.479	-7.16428			277.7	106.95	48.2	64.55			26.7066	19.6662	23.2561	31.13
	1044.9	1566.66	674.798	507.658			10.7471	5.21485	-13.1168	-14.4683			372.85	432.9	47.65	118.2			27.7432	22.1555	30.452	23.4764
	1031.27	1845.35	414.69	1472.86			4.65682	9.99854	-12.8186	-14.5555			256.15	124.85	43.35	82.7			37.7166	23.5197	25.5728	22.539
	892.61	1309.74	812.929	1416.18			8.23505	11.9667	-26.6159	1.94037			240.5	153.65	52.45				25.7157	24.8686	25.2537	27.4357
	1336.26	1913.02	703.316				4.68942	12.2731	-1.907				220.3	140.25	61.45				25.0495	34.4396	35.3353
	4663.32	1958.96	1256.54				7.48136	5.31547	-16.1977				211.85	116	58.65				28.5433	21.5233	34.4237
	883.831	3297.38	997.528				10.7925	8.66701	-18.696				245.2	319.55	69.35				27.0599	33.4861	49.7895
	2384.47	1756.03	558.181				11.2477	13.1667	-6.77303				181.8	164.85	78.3				21.4487	25.5759	29.0153
	3851.61	1252.53	745.15				6.34439	9.61171	-19.2804				239.3	127.6	97.65				30.6474	27.6603	29.5314
	1887.91	1153	1090.81				11.5494	9.47849	-14.9331				164.2		64.9				35.8529	27.2141	25.4409
	1953.94	624.79	706.97				12.107	12.8083	-10.4528				128.9						27.6204	63.2941	25.4308
	3904.95	2286.45	1076.25				6.01297	6.14171	-8.23299				285.1						34.1178	28.2897	24.7211
	3323.56	1979.64					4.84822						255.65						24.0066	53.7739
	3036.03	2141.58					4.85956						232.7						26.3688	25.1432
	2173.43	1442.48					10.5721						218.2						22.1554	18.2421
	1407.46	2002.48					8.77438						370						25.5567	29.5534
	2431.15	935.357					12.494						292.2						30.1707	39.2651
	2575	1320.3					7.9732						321.55						31.9509	36.4244
	2099.52	990.534					8.05089						301.2						24.3744	61.1379
	2186.97	1113.63					10.9419						263.75						24.2332	33.1076
	1761.95	1345.9					5.26665						108.15						24.9832	29.5825
	1222.74						4.11528												40.0629
	2244.76						8.40147												25.6351
	694.072						8.92869												25.7883
	3022.21						10.782												25.5071
	711.298						6.14121												27.3687
	2628.44						12.0361												20.9303
	2086.45																		28.6554
	1350.01																		24.8016
	1448.97																		64.4076
	2207.65																		32.2833
	2147.93																		27.5581
	2031.26																		73.1099
	2310.89																		47.3126
	504.38																		28.7515
