# Supplementary material for: Dendritic osmosensors modulate activity-induced calcium influx in oxytocinergic magnocellular neurons of the mouse PVN
Source: eLife journal article supplement (doi:10.7554/elife.63486), 2021-07-12
Supplement: supp [file elife-63486-supp-v1.zip › elife_poa_e63486_Figure_1_source_data_1.xlsx]

## Sheet: Fig. 1
Panel E	Mean Current after step (pA)			Panel G	Delay to First Spike (msec)					Membrane Resistance (MΩ)				Whole-cell Capacitance (pF)
n cells	51	22		n cells	36	19			n cells	62	22		n cells	62	22
n animals	21	9		n animals	15	8			n animals	27	9		n animals	27	9
	OT-MCN	OT-PCN			OT-MCN	OT-PCN				OT-MCN	OT-PCN			OT-MCN	OT-PCN
	10.9399	-12.7507			285.7	63.25				1020.86	745.15			26.5071	29.5314
	4.70044	-10.5805			175.9	58.1				1712.96	1090.81			25.0376	25.4409
	10.6336	-13.4268			174.8	53.85				703.274	706.97			35.1647	22.539
	13.0086	-1.20849			106.95	64.55				1067.89	1472.86			28.1865	25.4308
	15.2306	-13.479			432.9	118.2				2501.43	1076.25			27.2399	27.4357
	7.812	-29.475			124.85	82.7				1977.82	1416.18			19.6662	24.7211
	10.4668	-30.2185			153.65	43.2				1044.9	1046.83			22.1555	41.965
	9.3485	-7.16428			140.25	44.45				1031.27	507.658			33.7915	23.4764
	5.21485	-14.4683			116	58.75				892.61	551.265			26.7066	31.13
	14.9868	-14.5555			319.55	48.2				1336.26	619.442			27.7432	29.1516
	8.22914	1.94037			164.85	47.65				1873.61	1299.5			37.7166	25.3239
	10.7471	-13.1168			127.6	43.35				1351.11	1343.61			25.7157	23.2561
	9.99854	-12.8186			267.7	52.45				1566.66	664.681			23.5197	30.452
	4.65682	-26.6159			207.7	61.45				1845.35	329.077			24.8686	25.5728
	8.23505	-1.907			392.25	58.65				4663.32	517.649			34.4396	25.2537
	11.9667	-16.1977			277.7	69.35				883.831	674.798			21.5233	35.3353
	12.2731	-18.696			372.85	78.3				1309.74	414.69			25.0495	34.4237
	4.68942	-6.77303			256.15	97.65				2384.47	812.929			28.5433	49.7895
	7.48136	-19.2804			240.5	64.9				1913.02	703.316			27.0599	29.0153
	10.7925	-14.9331			220.3					1958.96	1256.54			21.4487	24.2776
	11.2477	-10.4528			211.85					3851.61	997.528			30.6474	21.5325
	5.31547	-8.23299			245.2					1887.91	558.181			35.8529	50.9402
	8.66701				181.8					1953.94				27.6204
	13.1667				239.3					3904.95				33.4861
	6.34439				164.2					3323.56				25.5759
	11.5494				128.9					3036.03				34.1178
	12.107				285.1					2173.43				24.0066
	6.01297				255.65					1407.46				26.3688
	9.61171				232.7					2431.15				22.1554
	9.47849				218.2					3297.38				27.6603
	12.8083				370					1756.03				27.2141
	4.84822				292.2					1252.53				63.2941
	4.85956				321.55					1153				28.2897
	10.5721				301.2					2575				25.5567
	8.77438				263.75					2099.52				30.1707
	12.494				108.15					2186.97				31.9509
	7.9732									1761.95				24.3744
	8.05089									624.79				24.2332
	10.9419									2286.45				24.9832
	5.26665									1222.74				40.0629
	4.11528									2244.76				25.6351
	6.14171									694.072				25.7883
	8.40147									3022.21				53.7739
	8.92869									711.298				25.1432
	10.782									2628.44				25.5071
	6.14121									2086.45				18.2421
	12.0361									1979.64				27.3687
	10.9567									2141.58				20.9303
	12.2413									1442.48				29.5534
	8.84858									2002.48				39.2651
	6.56467									1350.01				36.4244
										1448.97				61.1379
										2207.65				28.6554
										2147.93				24.8016
										2031.26				64.4076
										935.357				32.2833
										1320.3				33.1076
										990.534				29.5825
										1113.63				27.5581
										1345.9				73.1099
										2310.89				47.3126
										504.38				28.7515
