# Supplementary material for: Dendritic osmosensors modulate activity-induced calcium influx in oxytocinergic magnocellular neurons of the mouse PVN
Source: eLife journal article supplement (doi:10.7554/elife.63486), 2021-07-12
Supplement: supp [file elife-63486-supp-v1.zip › elife_poa_e63486_Figure_2_source_data_1.xlsx]

## Sheet: Fig. 2
Panel C	DAP frequency (Hz)
n cells	9	9	6
n animals	3	4	4
	OT-MCN (+30 mOsm)	OT-MCN (+15 mOsm)	OT-PCN (+30 mOsm)
	2.6125	0.23445	1.71881
	3.35	3.51675	0.68503
	2.2	2.61722	0.94659
	5.1125	0.79904	1.20815
	3.5875	3.4689	0.1121
	0.7375	0.73684	-0.26156
	5.4625	0.85646
	2.025	1.81818
	5.2125	-1.52153
