# Supplementary material for: Dendritic osmosensors modulate activity-induced calcium influx in oxytocinergic magnocellular neurons of the mouse PVN
Source: eLife journal article supplement (doi:10.7554/elife.63486), 2021-07-12
Supplement: supp [file elife-63486-supp-v1.zip › elife_poa_e63486_Figure_3_figure_supplement_1_source_data_1.xlsx]

## Sheet: Sheet1
Panel B	Dendritic calcium response (as % of that observed during baseline)										Panel B	Dendritic calcium response (as % of that observed during baseline)
Proximal dendrite											Distal dendrite
n cells	5										n cells	6
n animals	2										n animals	3
Time (min)	Cell 1	Cell 2	Cell 3	Cell 4	Cell 5	Average	SE				Time (min)	Cell 1	Cell 2	Cell 3	Cell 4	Cell 5	Cell6	Average	SE
1.66667	1.18348	1.07	1.15727	1.00289	0.71287	1.0253	0.08442				1.66667	0.94174	1.06203	0.55165	1.02491	0.88385	0.98324	0.9079	0.07567
2.5	1.21126	1.10282	1.2398	1.02222	0.98776	1.11277	0.04988				2.5	1.14628	1.24691	1.03284	0.85898	0.59656	0.72496	0.93442	0.10262
3.33333	0.91893	0.98093	0.87648	1.03314	0.93091	0.94808	0.02701				3.33333	1.05015	1.1463	1.08155	0.91976	1.0054	0.92581	1.02149	0.03641
4.16667	0.92953	0.98342	0.96008	0.94623	0.88209	0.94027	0.01701				4.16667	0.67622	1.0864	0.92723	1.05948	1.18013	1.2213	1.02513	0.0814
5	0.94029	0.93282	0.92365	0.99842	1.19923	0.99888	0.05177				5	1.12736	0.52038	0.95839	1.16178	1.21791	1.12793	1.01896	0.10581
5.83333	0.82858	0.97884	0.94928	1.05427	1.14824	0.99184	0.05338				5.83333	1.19937	0.83886	0.86411	1.04307	1.22261	0.86893	1.00616	0.07131
6.66667	0.92578	0.99525	1.38628	0.81377	1.10158	1.04453	0.09742				6.66667	1.27682	0.47168	0.58342	1.18421	1.06754	0.8511	0.9058	0.13375
7.5	0.8757	0.95278	1.29842	0.55587	0.99374	0.9353	0.11897				7.5	1.28791	0.51988	0.5978	1.28861	1.01818	0.74504	0.90957	0.13841
8.33333	0.70356	0.92254	1.24655	0.40866	0.84695	0.82565	0.13707				8.33333	1.15546	0.435	0.51573	1.16612	0.90887	0.44406	0.77087	0.14235
9.16667	0.58796	0.86353	0.8124	0.38909	0.73536	0.67767	0.08584				9.16667	0.72053	0.93537	0.40073	0.7471	0.82661	0.40947	0.6733	0.09014
10	0.54948	0.74424	0.73957	0.26671	0.67492	0.59499	0.08928				10	0.90308	1.10173	0.30203	0.47985	0.74495	0.35833	0.64833	0.13067
10.8333	0.48264	0.62404	0.56768	0.26484	0.4768	0.4832	0.06111				10.8333	0.80282	0.79947	0.26918	0.51072	0.66325	0.39284	0.57305	0.08961
11.6667	0.40073	0.56611	0.513	0.37443	0.40864	0.45258	0.03692				11.6667	0.89342	0.61726	0.28521	0.49879	0.47692	0.3127	0.51405	0.09112
12.5	0.35466	0.48619	0.38045	0.18415	0.43646	0.36838	0.05138				12.5	0.80295	0.7543	0.45473	0.60099	0.45853	0.44243	0.58565	0.06575
13.3333	0.37008	0.45303	0.40304	0.14108	0.27788	0.32902	0.05499				13.3333	0.72758	0.76913	0.39406	0.40531	0.51387	0.16769	0.49627	0.09219
14.1667	0.29675	0.41264	0.437	0.15007	0.26354	0.312	0.05223				14.1667	0.62892	0.42582	0.31795	0.4425	0.60392	0.21472	0.43897	0.06542
15	0.22028	0.35605	0.47368	0.17782	0.21681	0.28893	0.05518				15	0.62095	0.40249	0.31856	0.59329	0.51874	0.23532	0.44822	0.06327
15.8333	0.19828	0.33316	0.29271	0.14288	0.24049	0.2415	0.03363				15.8333	0.58388	0.36751	0.24843	0.42287	0.47198	0.19059	0.38088	0.05922
16.6667	0.21139	0.33658	0.43149	0.12735	0.32735	0.28683	0.05299				16.6667	0.53301	0.39668	0.36477	0.34629	0.37098	0.21312	0.37081	0.04183
17.5	0.15263	0.24553	0.3955	0.06518	0.24316	0.2204	0.055				17.5	0.62484	0.292	0.28701	0.34481	0.37165	0.23826	0.35976	0.05636
18.3333	0.17628	0.25074	0.29349	0.10275	0.18577	0.20181	0.0328				18.3333	0.44269	0.31746	0.25398	0.29038	0.24326	0.21907	0.29447	0.03289
19.1667	0.14579	0.15697	0.25568	0.0787	0.21012	0.16945	0.03003				19.1667	0.3567	0.40972	0.25133	0.26928	0.33382	0.21844	0.30655	0.0295
20	0.19081	0.19895	0.24688	0.09505	0.25701	0.19774	0.02874				20	0.39113	0.42278	0.34044	0.34888	0.24572	0.19036	0.32322	0.03612
20.8333	0.13924	0.19947	0.14007	0.08558	0.2289	0.15865	0.02516				20.8333	0.37602	0.36305	0.19531	0.29583	0.21418	0.17833	0.27045	0.03543
21.6667			0.32827	0.06517	0.21922	0.20422	0.07632				21.6667	0.37802	0.32313	0.3093	0.24528	0.16235	0.18257	0.26677	0.03455
22.5			0.47559	0.43368	0.61476	0.50801	0.05473				22.5	0.49134	0.72028	0.36093	0.31592	0.22274	0.16361	0.37914	0.0825
23.3333			0.82471	0.84881	1.02866	0.90073	0.06434				23.3333	0.33682	1.54217	2.13456	0.89646	0.33688	0.21916	0.91101	0.31799
24.1667			0.85398	0.989	1.09294	0.97864	0.06917				24.1667	0.42824	1.52192	1.41029	0.70926	1.40123	1.24918	1.12002	0.18155
