# Supplementary material for: Dendritic osmosensors modulate activity-induced calcium influx in oxytocinergic magnocellular neurons of the mouse PVN
Source: eLife journal article supplement (doi:10.7554/elife.63486), 2021-07-12
Supplement: supp [file elife-63486-supp-v1.zip › elife_poa_e63486_Figure_3_source_data_1.xlsx]

## Sheet: Fig. 3
Panel C	Dendritic calcium response (as % of that observed at 0 mm)
Dendrite- K-glu internal									Dendrite - Cs-glu internal										Axon - K-glu internal
n cells	5								n cells	6									n cells	5
n animals	4								n animals	2									n animals	2
Distance from Soma (µm)	Cell 1	Cell 2	Cell 3	Cell 4	Cell 5	Average	SE		Distance from Soma (µm)	Cell 1	Cell 2	Cell 3	Cell 4	Cell 5	Cell 6	Average	SE		Distance from Soma (µm)	Cell 1	Cell 2	Cell 3	Cell 4	Cell 5	Average	SE
0	100	100	100	100	100	100	0		0	100	100	100	100	100	100	100	0		0	100	100	100	100	100	100	0
30	143.81	139.12	112.5	97.9546	129.459	124.569	8.54357		30	148.821	163.487	114.769	165.967	121.916	143.769	143.121	8.60842		30	145.707	91.0666	111.924	103.511	125.421	115.526	9.39253
60	44.39	105.69	99.67	137.3	109.065	99.2232	15.1582		60	132.576	126.638	134.637	118.694	114.664	135.689	127.149	3.58734		60	128.091	73.7858	148.508	98.5776	143.365	118.465	14.1545
90	27.49	111.2	59.44	132.194	87.3038	83.5256	18.5322		90	157.85	155.153	125.923	135.962	118.417	116.33	134.939	7.38272		90	93.2981	94.745	108.063	139.197	133.872	113.835	9.65448
120	27.63	95.94	29.53	84.5056	79.0668	63.3345	14.4506		120	150.684	130.361	138.384	98.7684	144.514	91.296	125.668	10.1155		120	88.929	79.8247	136.033	124.697	93.3048	104.558	10.9062
150	14.92	80.99	23.95	52.0836	55.737	45.5361	11.8474		150	161.018	160.948	127.994	107.656	117.473	84.1695	126.543	12.3947		150	91.8088	89.1623	127.493	90.7048	99.8694	99.8077	7.16467
180	22.81	57.1	14.64	40.6149	20.8653	31.2061	7.78101		180	116.715	120.734	134.94	149.947	114.566	132.304	128.201	5.50361		180	89.012	90.4481	128.219		100.91	102.147	9.08597
210	15.51	57.4	15.61	44.5543	26.8727	31.9894	8.2753		210	114.189	93.0675	130.454		104.496	114.381	111.317	6.1783		210	88.199	93.9539	118.036		83.1913	95.8452	7.71693
240			14.37	30.6038	8.49184	17.8219	6.61239		240	103.154		127.417		93.8576	154.066	119.623	13.485		240		87.6447	141.17		71.3198	100.045	21.0956
