# Supplementary material for: Dendritic osmosensors modulate activity-induced calcium influx in oxytocinergic magnocellular neurons of the mouse PVN
Source: eLife journal article supplement (doi:10.7554/elife.63486), 2021-07-12
Supplement: supp [file elife-63486-supp-v1.zip › elife_poa_e63486_Figure_4_figure_supplement_1_source_data_1.xlsx]

## Sheet: Fig. 4-1
Panel A	Dendritic calcium response (% change)
n cells	6	5		7	12
n animals	3	5		6	7
+15 mOsm	Proximal (male)	Proximal (female)		Distal (Male)	Distal (Female)
	-11.9588	-4.65518		-27.8656	-22.702
	-24.6185	12.9771		-49.0329	-53.2345
	-1.54581	-32.026		-22.5755	-47.099
	-20.0905	-13.6298		-58.5892	-75.3183
	-14.4003	-29.155		-48.7382	-43.6196
	-12.5043			-35.3592	-42.1586
				-12.8529	-61.0062
					-15.633
					-44.5201
					-33.4736
					-51.9549
					-1.9095
