# Supplementary material for: Dendritic osmosensors modulate activity-induced calcium influx in oxytocinergic magnocellular neurons of the mouse PVN
Source: eLife journal article supplement (doi:10.7554/elife.63486), 2021-07-12
Supplement: supp [file elife-63486-supp-v1.zip › elife_poa_e63486_Figure_4_figure_supplement_2_source_data_1.xlsx]

## Sheet: fig 4-2
Panel A	Dendritic basal calcium response (% change)					Panel B	Proximal calcium change (%)				Panel B	Distal calcium change (%)
n cells	32	43				n cells	32	32			n cells	43	43
n animals	16	24				n animals	16	16			n animals	24	24
+15 mOsm	Proximal dendrite	Distal dendrite				+15 mOsm	ΔBasal F/F	ΔPeak ΔF/F			+15 mOsm	ΔBasal F/F	ΔPeak ΔF/F
	6.05835	16.4365					6.05835	12.9771				16.4365	-53.2345
	10.689	11.3842					10.689	-13.6298				11.3842	-75.3183
	-4.26919	-8.0571					-4.26919	-32.026				-8.0571	-47.099
	3.89847	18.5695					3.89847	-4.65518				18.5695	-22.702
	21.2141	-5.05075					21.2141	-29.155				-5.05075	-43.6196
	3.80381	-0.11745					3.80381	-24.6185				-0.11745	-12.8529
	6.67244	-1.79495					6.67244	-42.2268				-1.79495	-15.1891
	1.13939	-3.46645					1.13939	33.048				-3.46645	-72.2596
	4.11522	-1.46004					4.11522	6.12879				-1.46004	-62.9278
	0.13412	7.97678					0.13412	-6.97807				7.97678	-54.5984
	-3.3351	10.1662					-3.3351	-57.6399				10.1662	-68.9043
	9.70609	1.72427					9.70609	-42.5817				1.72427	-65.6723
	14.5402	20.8832					14.5402	11.3611				20.8832	-43.3242
	21.6113	-9.98024					21.6113	-34.9492				-9.98024	-41.7629
	12.1953	15.7595					12.1953	-34.0331				15.7595	-77.5856
	13.1856	19.673					13.1856	-1.54581				19.673	-65.0033
	-9.63003	31.0557					-9.63003	-20.0905				31.0557	-27.8656
	34.4482	17.1493					34.4482	-14.4003				17.1493	-22.5755
	-25.0649	19.4101					-25.0649	-12.5043				19.4101	-42.1586
	1.16303	-17.1612					1.16303	-9.48229				-17.1612	-58.5892
	3.43233	19.7509					3.43233	-32.7471				19.7509	-65.0033
	6.23657	-5.06852					6.23657	-13.2138				-5.06852	-35.3592
	6.57529	-46.4301					6.57529	-15.5379				-46.4301	-61.0062
	-0.56786	-1.30649					-0.56786	-7.53311				-1.30649	-15.633
	0.64907	21.5841					0.64907	-2.50355				21.5841	-48.7382
	7.10874	27.7059					7.10874	-12.2579				27.7059	-44.5201
	-4.24858	-24.5299					-4.24858	-14.0103				-24.5299	-33.4736
	7.79268	-29.8947					7.79268	5.36161				-29.8947	-51.9549
	-13.8278	8.77812					-13.8278	11.1737				8.77812	-1.9095
	4.25867	0.07776					4.25867	-41.9327				0.07776	-42.2783
	3.21004	15.3069					3.21004	-1.77092				15.3069	-25.0408
	-21.5876	46.4849					-21.5876	-23.9824				46.4849	-35.3586
		20.5174										20.5174	-32.5523
		4.29342										4.29342	-41.2935
		-7.32118										-7.32118	-53.0828
		-5.07288										-5.07288	11.8756
		7.88382										7.88382	-50.5617
		15.905										15.905	-17.4532
		20.8166										20.8166	-45.247
		17.4677										17.4677	-37.4978
		7.95687										7.95687	-61.9231
		-6.27181										-6.27181	-21.9257
		8.82442										8.82442	-56.5432
