# Supplementary material for: Dendritic osmosensors modulate activity-induced calcium influx in oxytocinergic magnocellular neurons of the mouse PVN
Source: eLife journal article supplement (doi:10.7554/elife.63486), 2021-07-12
Supplement: supp [file elife-63486-supp-v1.zip › elife_poa_e63486_Figure_4_figure_supplement_3_source_data_1.xlsx]

## Sheet: Sheet1
Panel C	Dendritic calcium response (% change)
n cells	7	6
n animals	2	2
+15 mOsm	Proximal dendrite	Distal dendrite
	-9.48229	-42.2783
	-32.7471	-25.0408
	-13.2138	-35.3586
	-15.5379	-32.5523
	-7.53311	-41.2935
	-2.50355	-53.0828
	-12.2579
