# Supplementary material for: Dendritic osmosensors modulate activity-induced calcium influx in oxytocinergic magnocellular neurons of the mouse PVN
Source: eLife journal article supplement (doi:10.7554/elife.63486), 2021-07-12
Supplement: supp [file elife-63486-supp-v1.zip › elife_poa_e63486_Figure_4_source_data_1.xlsx]

## Sheet: Fig. 4
Panel C	Dendritic calcium response (% change)							Panel D	Dendritic calcium response (% change)					Input Resistance (MΩ)
n cells	11	20		9	9			n cells	4	4				n cells	38
n animals	7	14		5	5			n animals	4	4				n animals	16
+15 mOsm	Proximal	Distal		Proximal (TTX)	Distal (TTX)			+0 mOsm	15 min	25 min				Before MT	After MT
	-4.65518	-27.8656		33.048	-15.1891				5.53888	3.84532				1168.44	1207.67
	12.9771	-22.702		6.12879	-72.2596				3.32115	9.41944				1472.5	1484.95
	-32.026	-53.2345		-6.97807	-62.9278				-10.5891	-9.818				2091.35	1610.78
	-13.6298	-47.099		-57.6399	-54.5984				-6.20575	14.9604				1273.68	1016.05
	-29.155	-75.3183		-42.5817	-68.9043									1032.58	1135.11
	-11.9588	-43.6196		11.3611	-65.6723									1081.44	394.667
	-24.6185	-49.0329		30.8443	-43.3242									1531.45	811.058
	-1.54581	-22.5755		-34.9492	-41.7629									2483.51	3378.29
	-20.0905	-65.0033		-34.0331	-77.5856									1706.08	2706.65
	-14.4003	-42.1586												793.892	517.126
	-12.5043	-58.5892												1038.07	1326.63
		-61.0062												932.609	1180.88
		-15.633												3204.68	3112.24
		-48.7382												3286.1	1598.04
		-35.3592												999.143	972.661
		-44.5201												1304.43	887.83
		-33.4736												1630.9	1232.93
		-51.9549												1350.33	1076.03
		-1.9095												1668.56	1398.94
		-12.8529												863.325	939.353
														1844.65	1490.36
														452.916	395.64
														918.674	1061.18
														319.659	226.749
														1987.01	1718.14
														890.396	720.167
														704.32	1252.82
														945.351	865.526
														1306.63	1342.29
														2364.21	2120.43
														883.929	853.404
														791.921	824.965
														1248.36	1411.53
														987.174	900.479
														1846.21	1723.23
														1327.34	1194.56
														360.687	599.388
														1380.06	1037
