# Supplementary material for: Dendritic osmosensors modulate activity-induced calcium influx in oxytocinergic magnocellular neurons of the mouse PVN
Source: eLife journal article supplement (doi:10.7554/elife.63486), 2021-07-12
Supplement: supp [file elife-63486-supp-v1.zip › elife_poa_e63486_Figure_5_source_data_1.xlsx]

## Sheet: Fig. 5
Panel B	Somatic current (% change)				Panel C	Dendritic calcium response (% change)
n cells	5	10			n cells	10	10
n animals	3	6			n animals	6	6
+15 mOsm	Dendritic Stimulation	Somatic Stimulation				Dendritic Stimulation	Somatic Stimulation
	-34.8133	-21.1648				-4.06568	-61.0062
	-43.8003	-0.76486				31.0855	-15.633
	-89.8912	-2.41549				-25.1062	-48.7382
	-70.9316	3.91452				1.38779	11.8756
	-72.967	-15.9246				-13.753	-50.5617
		-11.4018				8.67988	-35.3592
		28.8628				60.6604	-44.5201
		8.54049				8.484	-33.4736
		-12.0249				-29.9325	-51.9549
		-1.41329				-18.012	-1.9095
