# Supplementary material for: Dendritic osmosensors modulate activity-induced calcium influx in oxytocinergic magnocellular neurons of the mouse PVN
Source: eLife journal article supplement (doi:10.7554/elife.63486), 2021-07-12
Supplement: supp [file elife-63486-supp-v1.zip › elife_poa_e63486_Figure_6_source_data_1.xlsx]

## Sheet: Fig. 6
Panel A	Dendritic calcium response, OT-MCNs (% change)			Panel B	Dendritic calcium response, OT-PCNs (% change)			Panel C	Dendritic calcium response, CA1 Pyr Cells (% change)			Panel D	Dendritic calcium response, OT-MCNs, hypoosmotic stress (% change)
n cells	5	5		n cells	5	5		n cells	6	6		n cells	11	11
n animals	4	4		n animals	4	4		n animals	2	2		n animals	5	5
+15 mOsm	Distal Axon	Distal Dendrite			Proximal Dendrite	Distal Dendrite			Proximal Dendrite	Distal Dendrite		-30 mOsm	Proximal Dendrite	Distal Dendrite
	-8.18265	-65.0033			7.18065	2.04185			-8.12358	1.01436			2.92958	74.9206
	-14.8722	-22.5755			-6.65213	12.4178			-15.4858	2.1887			-14.7226	106.107
	-15.7429	-31.5626			-14.5958	15.6139			-7.71265	-6.63714			3.81659	14.3513
	-7.80932	-42.1586			-6.9252	5.90221			-0.51355	-2.60001			-6.34452	41.5366
	-3.57944	-58.5892			-17.6702	-2.91303			0.76786	-19.7251			-18.2289	-0.55413
									-7.47622	2.98691			6.51191	3.19391
													6.53087	20.0207
													-17.6355	50.7479
													8.40029	0.57494
													-2.05594	-4.61492
													8.43902	45.1345
