# Supplementary material for: Dendritic osmosensors modulate activity-induced calcium influx in oxytocinergic magnocellular neurons of the mouse PVN
Source: eLife journal article supplement (doi:10.7554/elife.63486), 2021-07-12
Supplement: supp [file elife-63486-supp-v1.zip › elife_poa_e63486_Figure_7_source_data_1.xlsx]

## Sheet: Fig. 7
Panel D	eEPSC Amplitude (% change)
n cells	6	8
n animals	4	4
+15 mOsm	Proximal Dendrite	Distatl Dendrite
	-62.1049	-37.761
	-42.3096	-54.7987
	-38.2231	-85.9901
	-27.9832	-25.9651
	6.09658	-85.857
	-16.4907	-92.2929
		-50.5022
		-73.7258
