# Supplementary material for: Dendritic osmosensors modulate activity-induced calcium influx in oxytocinergic magnocellular neurons of the mouse PVN
Source: eLife journal article supplement (doi:10.7554/elife.63486), 2021-07-12
Supplement: supp [file elife-63486-supp-v1.zip › elife_poa_e63486_Figure_8_figure_supplement_1_source_data_1.xlsx]

## Sheet: Sheet1
Panel A	Distally evoked EPSC amplitude (% baseline)
n cells	8	6
n animals	4	3
+15 mOsm	Control	RR
	-37.761	-54.1397
	-54.7987	-60.8201
	-85.9901	-78.5273
	-25.9651	-63.8571
	-85.857	-77.4594
	-92.2929	-94.3007
	-50.5022
	-73.7258
