# Supplementary material for: Dendritic osmosensors modulate activity-induced calcium influx in oxytocinergic magnocellular neurons of the mouse PVN
Source: eLife journal article supplement (doi:10.7554/elife.63486), 2021-07-12
Supplement: supp [file elife-63486-supp-v1.zip › elife_poa_e63486_Figure_8_figure_supplement_2_source_data_1.xlsx]

## Sheet: Fig. 8-1
Panel A	Dendritic calcium response (% change)
n cells	7	7
n animals	2	2
+15 mOsm	Proximal Dendrite	Distal Dendrite
	9.14344	23.0194
	-32.0498	-33.277
	9.76158	-27.4972
	0.8381	18.7445
	-32.26	5.10203
	6.44455	11.3474
	-28.296	-5.7307
