# Supplementary material for: Dendritic osmosensors modulate activity-induced calcium influx in oxytocinergic magnocellular neurons of the mouse PVN
Source: eLife journal article supplement (doi:10.7554/elife.63486), 2021-07-12
Supplement: supp [file elife-63486-supp-v1.zip › elife_poa_e63486_Figure_8_source_data_1.xlsx]

## Sheet: Fig. 8
Panel B	Firing rate in OT-MCNs (DFreq, Hz)			Panel D	Dendritic calcium response (% change)
n cells	9	7		n cells	6	7
n animals	3	4		n animals	2	2
+30 mOsm	Control	RR		+15 mOsm	Proximal Dendrite	Distal Dendrite
	2.6125	0.475			-14.0103	-69.0943
	3.35	0.1625			5.36161	-17.4532
	2.2	-1.2			11.1737	-45.247
	5.1125	-0.4			-41.9327	-37.4978
	3.5875	3.1125			-1.77092	-61.9231
	0.7375	-0.2			-23.9824	-21.9257
	5.4625	0				-56.5432
	2.025
	5.2125
