# Supplementary material for: Dendritic osmosensors modulate activity-induced calcium influx in oxytocinergic magnocellular neurons of the mouse PVN
Source: eLife journal article supplement (doi:10.7554/elife.63486), 2021-07-12
Supplement: supp [file elife-63486-supp-v1.zip › elife_poa_e63486_Figure_9_source_data_1.xlsx]

## Sheet: Fig. 9
Panel C	Dendritic calcium response (% change)				Rm (MΩ)			Change in holding current (pA)
n cells	6	6		n cells	6	6		n cells	6
n animals	2	2		n animals	2	2		n animals	2
+muscimol	Proximal Dendrite	Distal Dendrite			Before Muscimol	After Muscimol			DiHold (+muscimol)
	-22.7217	-75.1816			943.692	195.428			26.5639
	-43.3569	-66.8895			1274.08	151.157			24.4789
	-50.2022	-71.3353			882.359	199.944			6.91101
	-19.8056	-85.2226			1438.51	166.959			24.4271
	-11.4191	-74.6267			718.147	439.109			-7.3438
	-42.3809	-81.3053			1811.77	203.023			17.1588
