# Supplementary figures and images for: Dendritic osmosensors modulate activity-induced calcium influx in oxytocinergic magnocellular neurons of the mouse PVN
Source: eLife journal article supplement (doi:10.7554/elife.63486), 2021-07-12

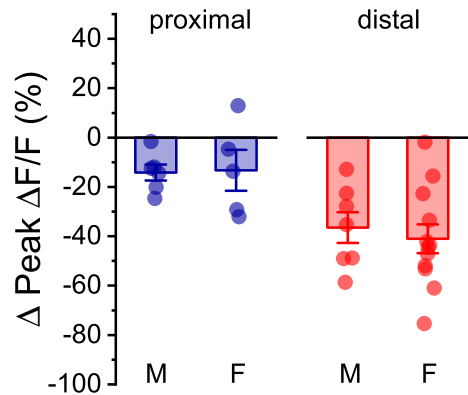

Supplement: supp [file elife-63486-supp-v1.zip]

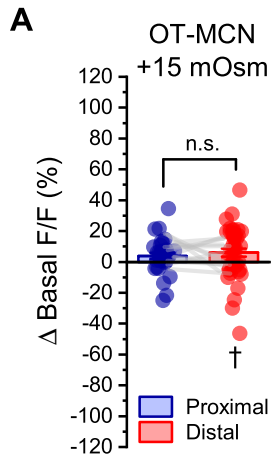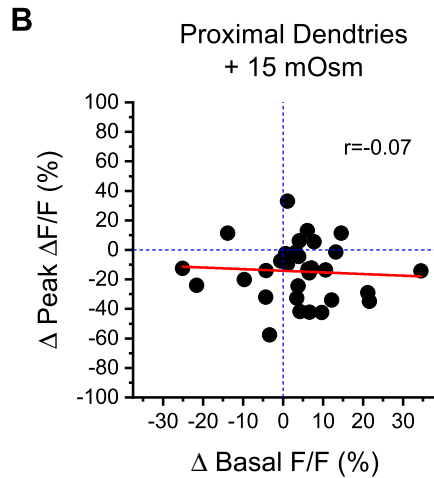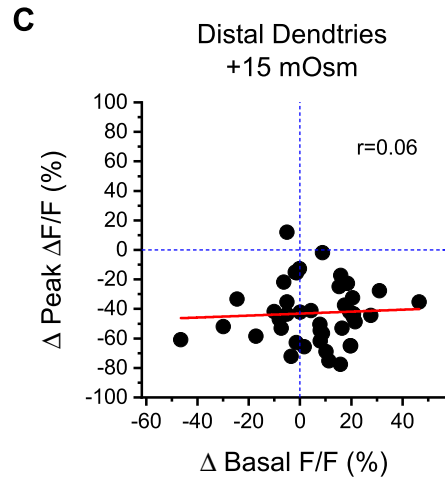

Supplement: supp [file elife-63486-supp-v1.zip]

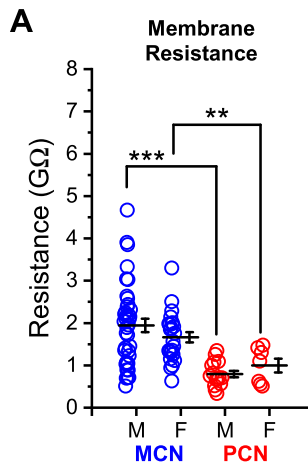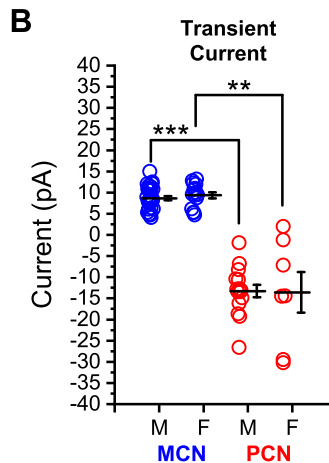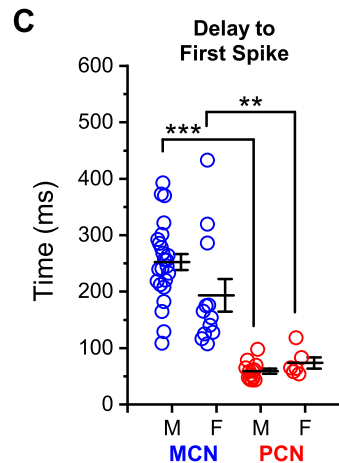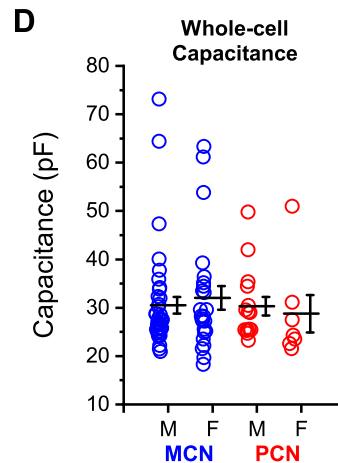

Supplement: supp [file elife-63486-supp-v1.zip › elife_poa_e63486_Figure_1_figure_supplement_1.pdf]

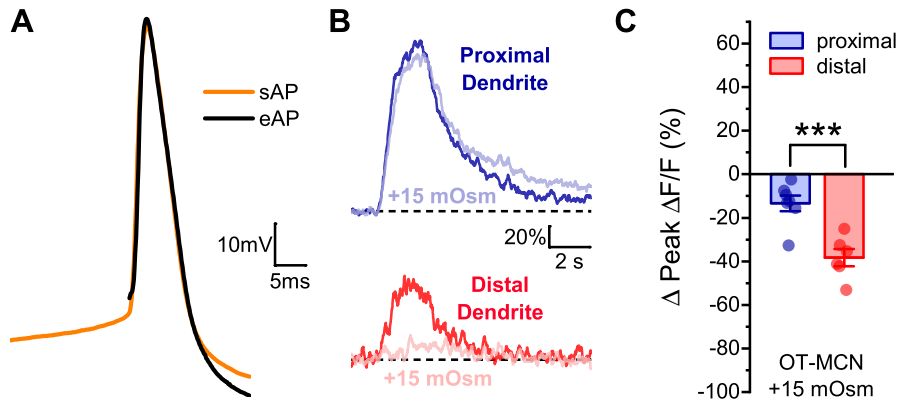

Supplement: supp [file elife-63486-supp-v1.zip › elife_poa_e63486_Figure_4_figure_supplement_3.pdf]
